# Supplementary material
Source: PubMed Central journal article supplement (PMC3046815)
Supplement: NIHMS266161-supplement-Supplementary_table.pdf [file NIHMS266161-supplement-Supplementary_table.pdf]

Juvenile dermatomyositis

| Sample ID | Age | Sex | WBC  | Hgb  | Plat | Neu#  | Lym# |
|-----------|-----|-----|------|------|------|-------|------|
| JDM30     | 9   | F   | 8.9  | 12.9 | 319  | 5.41  | 2.25 |
| JDM39     | 18  | F   | 4.9  | 12   | 410  | 2.34  | 1.33 |
| JDM83     | 5   | F   | 8.5  | 12.1 | 330  | 4.27  | 3.16 |
| JDM83     | 5   | F   | 7.8  | 11.6 | 284  | 4.33  | 2.52 |
| JDM93     | 6   | M   | 6.9  | 12   | 397  | 2.53  | 2.98 |
| JDM93     | 6   | M   | 8.5  | 11.6 | 342  | 7.35  | 0.85 |
| JDM104    | 6   | F   | 13.8 | 11.8 | 318  | 9.44  | 2.87 |
| JDM104    | 6   | F   | 11.3 | 12.3 | 369  | 6.62  | 3.47 |
| JDM109    | 4   | F   | 15.2 | 12.9 | 360  | 9.95  | 3.18 |
| JDM111    | 8   | F   | 6.3  | 11.6 | 268  | 2.85  | 2.14 |
| JDM113    | 8   | F   | 6    | 11.8 | 173  | 3.41  | 2.1  |
| JDM118    | 11  | M   | 12   | 12.8 | 347  | 7.57  | 2.73 |
| JDM121    | 18  | F   | 7.4  | 12.6 | 241  | 4.5   | 1.9  |
| JDM122    | 12  | M   | 4.4  | 13.3 | 238  | 2.06  | 1.48 |
| JDM123    | 16  | M   | 13.5 | 13.1 | 424  | 9.54  | 1.67 |
| JDM130    | 3   | M   | 15.1 | 10.9 | 344  | 10.39 | 2.26 |
| JDM131    | 11  | F   | 7.2  | 12.2 | 244  | 3.8   | 2.61 |
| JDM16     | 9   | F   | 5.9  | 13.9 | 242  | 3.31  | 1.8  |
| JDM41     | 16  | F   | 5.8  | 13.6 | 198  | 3.99  | 1.33 |
| JDM46     | 3   | F   | 5.9  | 14   | 318  | 3.26  | 2.05 |
| JDM47     | 14  | M   | 3.7  | 12.9 | 337  | 1.44  | 1.57 |
| JDM61     | 14  | F   | 6.2  | 14.4 | 237  | 3.33  | 1.79 |
| JDM101    | 13  | M   | 5.1  | 13.8 | 269  | 2.89  | 1.55 |
| JDM101    | 13  | M   | 5.2  | 13.9 | 300  | 3     | 1.54 |
| JDM112    | 15  | F   | 4.3  | 13.2 | 200  | 1.49  | 0.4  |
| JDM117    | 13  | F   | 4.1  | 12.5 | 279  | 2.18  | 1.17 |
| JDM1      | 8   | F   | 6    | 13.1 | 412  | 3.58  | 1.98 |
| JDM2      | 12  | F   | 6    | 14.6 | 265  | 3.34  | 2.04 |
| JDM21     | 18  | M   | 6    | 15.9 | 159  | 2.9   | 2.53 |
| JDM23     | 13  | F   | 4.5  | 12.2 | 201  | 1.71  | 1.87 |
| JDM26     | 13  | F   | 6.6  | 12.3 | 224  | 3.37  | 2.39 |
| JDM31     | 7   | F   | 5.9  | 11.7 | 324  | 2.61  | 2.44 |
| JDM35     | 6   | F   | 6.5  | 13   | 422  | 3.12  | 2.43 |
| JDM44     | 9   | F   | 6    | 14.2 | 339  | 2.58  | 2.18 |
| JDM49     | 13  | F   | 5.5  | 12.8 | 303  | 3.05  | 1.61 |
| JDM50     | 17  | F   | 4.9  | 12.3 | 253  | 2.18  | 1.97 |
| JDM59     | 9   | F   | 4.7  | 14   | 269  | 2.17  | 1.91 |
| JDM64     | 8   | F   | 9.2  | 15.3 | 360  | 4.43  | 3.88 |
| JDM76     | 13  | F   | 10.6 | 14.3 | 414  | 5.87  | 3.56 |
| JDM8      | 10  | F   | 6.1  | 13.4 | 349  | 3.16  | 2.34 |
| JDM82     | 7   | M   | 8.9  | 13.4 | 385  | 4.84  | 3.05 |
| JDM88     | 7   | F   | 11   | 14.1 | 342  | 4.5   | 5.06 |
| JDM102    | 5   | F   | 9.4  | 12.9 | 343  | 4.15  | 4.19 |
| JDM110    | 7   | F   | 5.1  | 13.1 | 375  | 2.5   | 1.79 |

|                     |        |    |     |      |      |      |      |      |
|---------------------|--------|----|-----|------|------|------|------|------|
|                     | JDM114 | 9  | F   | 10.9 | 14.7 | 400  | 9.72 | 0.85 |
|                     | JDM126 | 17 | F   | 9.7  | 12.2 | 151  | 6.7  | 2.53 |
|                     | JDM140 | 13 | M   | 6.3  | 14.3 | 282  | 3.25 | 2.19 |
| Psoriatic arthritis | PSOA7  | 17 | F   | 6    | 12.8 | 251  | 2.78 | 2.35 |
|                     | PSOA14 | 7  | F   | 8.1  | 14.3 | 450  | 4.5  | 2.2  |
|                     | PSOA17 | 11 | F   | 3.6  | 13.7 | 264  | 0.93 | 2.04 |
|                     | PSOA20 | 5  | F   | 5    | 12.2 | 322  | 1.84 | 2.29 |
|                     | PSOA21 | 6  | F   | 8.5  | 12.5 | 501  | 4.16 | 2.98 |
|                     | PSOA22 | 17 | F   | 7.4  | 14.8 | 194  | 4.37 | 1.89 |
|                     | PSOA26 | 17 | F   | 7.8  | 13.8 | 239  | 6.08 | 1.15 |
|                     | PSOA31 | 8  | F   | 4.8  | 13.2 | 306  | 2.36 | 1.75 |
|                     | PSOA44 | 8  | F   | 4.7  | 13.2 | 252  | 2.66 | 1.41 |
|                     | PSOA46 | 5  | F   | 6.8  | 12.4 | 381  | 3.33 | 2.77 |
|                     | PSOA48 | 5  | F   | 7.5  | 12.9 | 291  | 4.54 | 2.12 |
|                     | PSOA59 | 12 | M   | 5.4  | 13.8 | 343  | 2.07 | 2.69 |
|                     | PSOA64 | 12 | F   | 7.7  | 14   | 355  | 3.98 | 2.52 |
|                     | PSOA65 | 9  | M   | 5.6  | 12.5 | 209  | 2.41 | 2.57 |
|                     | PSOA66 | 13 | M   | 6.5  | 12.9 | 312  | 2.16 | 2.91 |
|                     | PSOA67 | 11 | F   | 8.3  | 12.5 | 365  | 5.75 | 1.24 |
|                     | PSOA68 | 5  | M   | 7.9  | 9.9  | 496  | 4.14 | 2.7  |
|                     | PSOA70 | 3  | F   | 6.4  | 10.4 | 483  | 1.65 | 4.12 |
|                     | PSOA71 | 8  | F   | 6.5  | 13.2 | 306  | 2.25 | 3.25 |
|                     | PSOA75 | 7  | F   | 6.6  | 13.5 | 402  | 3.44 | 2.5  |
|                     | PSOA77 | 8  | F   | 6.7  | 12.7 | 313  | 3    | 2.7  |
|                     | PSOA84 | 3  | F   | 9.3  | 11.3 | 466  | 4.52 | 3.96 |
|                     | PSOA85 | 5  | F   | 4.8  | 12.2 | 322  | 2.58 | 1.66 |
|                     | PSOA93 | 6  | F   | 6    | 13.4 | 277  | 2.68 | 2.56 |
|                     | PSOA94 | 12 | M   | 7.2  | 14.4 | 217  | 3.99 | 2.42 |
|                     | PSOA95 | 11 | F   | 13.1 | 11.7 | 428  | 8.71 | 3.29 |
|                     | PSOA97 | 8  | F   | 5.4  | 12   | 239  | 2.73 | 2.04 |
|                     | PSOA98 | 4  | F   | 7    | 13.2 | 333  | 3.81 | 2.33 |
| PSOA99              | 6      | M  | 4.5 | 12.3 | 290  | 2.94 | 1.1  |      |
| PSOA100             | 9      | F  | 3.6 | 13.1 | 284  | 1.63 | 1.75 |      |
| PSOA101             | 12     | F  | 5.3 | 13.3 | 226  | 3.09 | 1.6  |      |

Pink rows indicate active JDM patients with skin rash and/or myositis, while orange rows indicate JDM p

| Clinical data |     |       |      |      |     |     | Clinical s |      |
|---------------|-----|-------|------|------|-----|-----|------------|------|
| Mon#          | ESR | CPK   | ALD  | LDH  | AST | ALT | CMAS       | Rash |
| 1.08          | 16  | 181   | 11.1 | 342  | 38  | 30  | 44         | yes  |
| 0.7           | 23  | 2599  | >25  | 503  | 124 | 45  | low        | yes  |
| 0.82          | 34  | 142   | 4.4  | 273  | 35  | 17  | 33         | yes  |
| 0.78          | 34  | 142   | 4.4  | 273  | 35  | 17  | low        | yes  |
| 1.24          | 11  | 45    | 4.1  | 202  | 21  | 9   | 24         | yes  |
| 0.26          | 23  | 47    | 5.2  | 200  | 19  | 10  | 25         | yes  |
| 1.38          | 16  | 56    | 5.2  | 289  | 22  | 23  | 22         | yes  |
| 1.13          | 37  | 72    | 4.2  | 274  | 37  | 31  | 30         | yes  |
| 1.95          | 18  | 25    | 4.9  | 261  | 42  | 27  | 29         | yes  |
| 1.11          | 9   | 82    | 7.8  | 259  | 24  | 14  | 31         | yes  |
| 0.49          | 22  | 214   | 6.5  | 309  | 30  | 12  | 48         | yes  |
| 1.44          | 17  | 11332 | 25   | 685  | 356 | 145 | 0          | yes  |
| 0.92          | 17  | 1717  | 24.4 | 335  | 115 | 159 | 42         | yes  |
| 0.6           | 10  | 75    | 6.5  | 246  | 25  | 18  | 47         | yes  |
| 1.27          | 7   | 9935  | >25  | 1236 | 389 | 267 | 23         | yes  |
| 2.31          | 20  | 8354  | >25  | 910  | 212 | 90  | low        | yes  |
| 0.59          | 53  | 58    | 3.6  | 160  | 19  | 7   | low        | yes  |
| 0.55          | 3   | 52    | 4.7  | 208  | 23  | 20  | 51         | yes  |
| 0.4           | 7   | 105   | 4.5  | 173  | 20  | 11  | 52         | yes  |
| 0.5           | 9   | 50    | 2.6  | 126  | 17  | 13  | 52         | yes  |
| 0.57          | 17  | 85    | 5    | 279  | 34  | 32  | 52         | yes  |
| 0.76          | 3   | 78    | 3.4  | 151  | 22  | 15  | 52         | yes  |
| 0.45          | 10  | 67    | 3.9  | 162  | 26  | 25  | n.d.       | yes  |
| 0.54          | 15  | 111   | 5.3  | 209  | 48  | 60  | 52         | yes  |
| 0.22          | 6   | 159   | 5.8  | 255  | 16  | 14  | 50         | yes  |
| 0.55          | 6   | 138   | 6.8  | 207  | 29  | 14  | 52         | yes  |
| 0.4           | 36  | 62    | 3.1  | 207  | 32  | 20  | 52         | no   |
| 0.48          | 3   | 99    | 5.9  | 173  | 23  | 11  | 52         | no   |
| 0.45          | 1   | 105   | 3.4  | 146  | 12  | 10  | 52         | no   |
| 0.52          | 4   | 79    | 8.5  | 186  | 24  | 17  | 52         | no   |
| 0.63          | 20  | 47    | 3.8  | 175  | 20  | 10  | 52         | no   |
| 0.61          | 10  | 128   | 6.6  | 285  | 35  | 17  | 52         | no   |
| 0.63          | 9   | 79    | 3.6  | 224  | 25  | 15  | 48         | no   |
| 1.1           | 5   | 193   | 4.8  | 264  | 32  | 20  | 52         | no   |
| 0.66          | 6   | 62    | 2.9  | 166  | 18  | 9   | 52         | no   |
| 0.57          | 8   | 66    | 5.1  | 162  | 17  | 11  | 52         | no   |
| 0.39          | 8   | 85    | 4.5  | 197  | 27  | 18  | 52         | no   |
| 0.52          | 2   | 33    | 7.7  | 278  | 32  | 35  | 52         | no   |
| 0.86          | 5   | 75    | 3.7  | 156  | 15  | 9   | 51         | no   |
| 0.45          | 8   | n.d.  | n.d. | 233  | 23  | 19  | 52         | no   |
| 0.87          | 13  | 65    | 4.1  | 218  | 18  | 10  | 50         | no   |
| 1.3           | 2   | 88    | 3.3  | 192  | 16  | 11  | 52         | no   |
| 0.63          | 8   | 207   | 5.6  | 265  | 34  | 13  | 52         | no   |
| 0.49          | 14  | 130   | 5.7  | 236  | 29  | 24  | 52         | no   |

|      |    |      |     |      |     |     |     |     |
|------|----|------|-----|------|-----|-----|-----|-----|
| 0.25 | 11 | 32   | 4.3 | 169  | 17  | 15  | 51  | no  |
| 0.37 | 41 | 19   | 2.6 | 176  | 16  | 17  | 51  | no  |
| 0.61 | 14 | 80   | 2.5 | 127  | 14  | 14  | 52  | no  |
| 0.54 | 7  | 63   | 2.3 | 142  | 12  | 9   | N/A | no  |
| 0.57 | 11 | 112  | 6.1 | 258  | 30  | 13  | N/A | no  |
| 0.47 | 3  | n.p. | n.p | 251  | 29  | 21  | N/A | no  |
| 0.62 | 7  | 107  | 5.3 | 197  | 22  | 12  | N/A | no  |
| 0.77 | 14 | n.p. | n.p | 262  | 29  | 14  | N/A | no  |
| 0.82 | 2  | 58   | 3.9 | 183  | 15  | 12  | N/A | no  |
| 0.4  | 8  | n.p. | n.p | 123  | 11  | 10  | N/A | no  |
| 0.62 | 8  | 89   | 5   | 275  | 30  | 18  | N/A | no  |
| 0.53 | 4  | 72   | 4.2 | 204  | 26  | 15  | N/A | no  |
| 0.41 | 6  | n.p. | n.p | 260  | 33  | 14  | N/A | no  |
| 0.56 | 7  | 85   | 4.2 | 135  | 27  | 17  | N/A | no  |
| 0.39 | 4  | n.p. | n.p | 180  | 17  | 7   | N/A | no  |
| 0.71 | 7  | 68   | 5.7 | 210  | 18  | 12  | N/A | yes |
| 0.46 | 11 | 162  | 5.4 | 250  | 40  | 38  | N/A | no  |
| 0.69 | 5  | n.p. | n.p | 166  | 14  | 8   | N/A | no  |
| 0.73 | 2  | 67   | 8   | 260  | 44  | 43  | N/A | no  |
| 0.68 | 25 | 103  | 3.9 | 218  | 32  | 14  | N/A | no  |
| 0.49 | 7  | 80   | 4.4 | 227  | 29  | 23  | N/A | no  |
| 0.61 | 11 | 83   | 3.8 | 205  | 28  | 19  | N/A | no  |
| 0.5  | 6  | 150  | 5.8 | 237  | 36  | 19  | N/A | yes |
| 0.67 | 4  | n.p. | n.p | n.p. | 27  | 17  | N/A | no  |
| 0.53 | 16 | 56   | 4.9 | 245  | 25  | 16  | N/A | yes |
| 0.29 | 8  | n.p. | n.p | 222  | 46  | 38  | N/A | no  |
| 0.62 | 2  | 105  | 4.3 | 217  | 24  | 13  | N/A | no  |
| 0.52 | 19 | n.p. | n.p | 226  | 38  | 49  | N/A | no  |
| 0.91 | 17 | n.p. | n.p | 319  | 17  | 23  | N/A | no  |
| 0.44 | 6  | n.p. | n.p | 209  | 22  | 13  | N/A | no  |
| 0.63 | 2  | n.p. | n.p | 236  | 30  | 15  | N/A | yes |
| 0.26 | 10 | n.p. | n.p | n.p  | n.p | n.p | N/A | no  |
| 0.17 | 23 | n.p. | n.p | 263  | 22  | 23  | N/A | no  |
| 0.44 | 10 | n.p. | n.p | 147  | 13  | 10  | N/A | no  |

patients with rash only. CMAS: Childhood Myositis Assessment Scale; Myos: Myositis; Calcin.: Calcinosis



|    |    |    |       |         |       |    |            |
|----|----|----|-------|---------|-------|----|------------|
| no | no | 10 | no    | 15 qw   | no    | no |            |
| no | no | 10 | q4wks | 25 qw   | q2wks | no |            |
| no | no | 10 | no    | 17.5 qw | yes   | no |            |
| no | no | no | no    | 2.5     | no    | no | etanercept |
| no | no | no | no    | 10      | no    | no |            |
| no | no | no | no    | 12.5    | no    | no |            |
| no | no | no | no    | 15      | no    | no | etanercept |
| no | no | no | no    | 10      | no    | no | etanercept |
| no | no | no | no    | no      | no    | no | etanercept |
| no | no | no | no    | 20      | no    | no | etanercept |
| no | no | no | no    | no      | no    | no |            |
| no | no | no | no    | 20      | no    | no |            |
| no | no | no | no    | 10      | no    | no |            |
| no | no | no | no    | 5       | no    | no |            |
| no | no | no | no    | 15      | no    | no |            |
| no | no | no | no    | 25      | no    | no |            |
| no | no | no | no    | no      | no    | no |            |
| no | no | no | no    | 15      | no    | no |            |
| no | no | no | no    | 15      | no    | no |            |
| no | no | no | no    | 10      | no    | no |            |
| no | no | no | no    | 7.5     | no    | no |            |
| no | no | no | no    | 7.5     | no    | no | etanercept |
| no | no | no | no    | no      | no    | no | etanercept |
| no | no | no | yes   | no      | no    | no |            |
| no | no | no | no    | 10      | no    | no | etanercept |
| no | no | no | no    | 15      | no    | no |            |
| no | no | no | no    | no      | no    | no |            |
| no | no | no | no    | no      | no    | no |            |
| no | no | 10 | no    | 20      | no    | no | etanercept |
| no | no | no | no    | 17.5    | no    | no |            |
| no | no | no | no    | no      | no    | no |            |
| no | no | no | no    | 5       | no    | no |            |
| no | no | no | no    | 15      | no    | no |            |
| no | no | no | no    | 15      | no    | no |            |

; Pred: Prednisone; Ster IV: Steroids i.v. injection; MTX: methotrexate, IV Ig; Immunoglobulin i.v. injectic



on; Plaq. : Plaquenil (Hydroxychloroquine).
